# Supplementary material for: Synthesis and characterization of stable aqueous dispersions of silver nanoparticles through the Tollens processElectronic supplementary information (ESI) available: photographs of silver mirror, and of stable dispersions of silver nanoparticles from mixing diluted silvering solutions under sonication at various times. See http://www.rsc.org/suppdata/jm/b1/b107469e/
Source: Royal Society of Chemistry journal article supplement (doi:10.1039/b107469e), 2002-01-18
Supplement: b107469e.doc [file b107469e.doc]

**Electronic Supplementary Information**

**
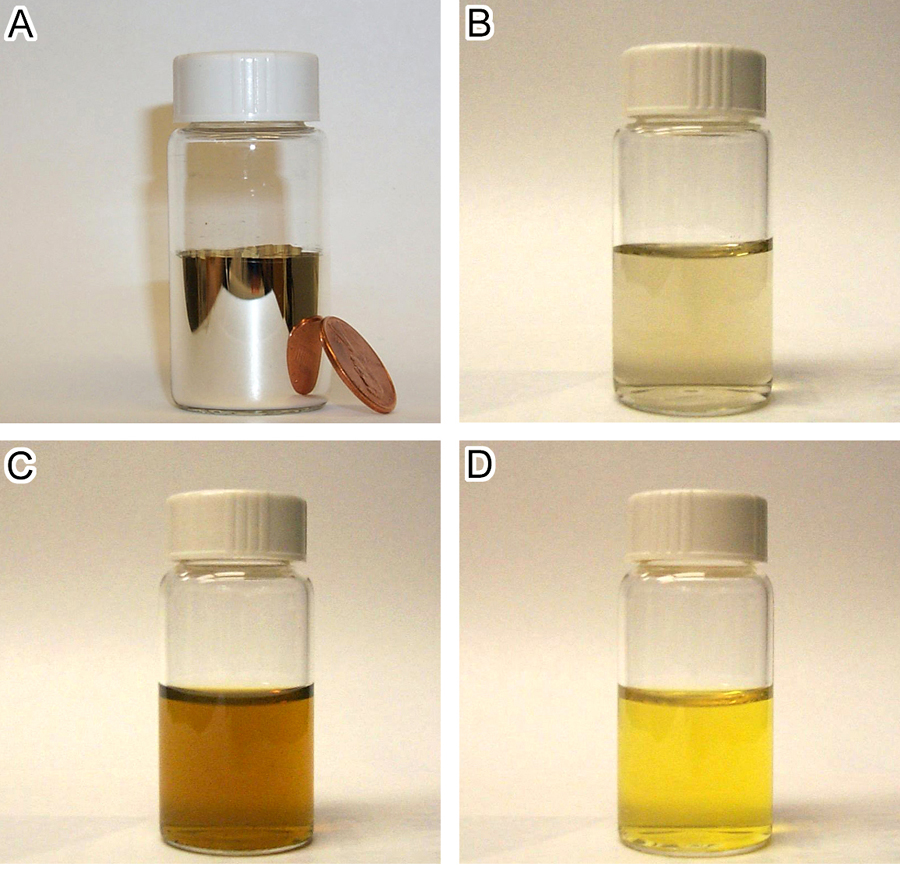
**

**Fig. S-1** (A) Photograph of silver mirror that was formed on the inside surface of a glass vial when concentrated silvering solutions were added. (B-D) Photographs of stable dispersions of silver nanoparticles obtained by mixing diluted silvering solutions under sonication at various times into the reaction: (B) 15; (C) 27; and (D) 33 min, respectively.
